# Supplementary material for: 2-Bromopalmitate targets retinoic acid receptor alpha and overcomes all-trans retinoic acid resistance of acute promyelocytic leukemia
Source: PubMed Central journal article supplement — Haematologica. 2018 Aug 3;104(1):102–12. doi: 10.3324/haematol.2018.191916 (PMC6312026; doi:10.3324/haematol.2018.191916), 2019-01
Supplement: 2018_191916-Disclosures_and_Contributions.pdf [file 2018_191916-Disclosures_and_Contributions.pdf]

Haematologica  
HAEMATOL/2018/191916  
Version 4

2-Bromopalmitate targets retinoic acid receptor alpha and overcomes  
all-trans retinoic acid resistance of acute promyelocytic leukemia

Ying Lu, Jin-Song Yan, Li Xia, Kang Qin, Qian-Qian Yin, Jiang-Tao Xu,  
Meng-Qing Gao, Xiao-Ning Qu, Yu-Ting Sun, and Guo-Qiang Chen

Disclosures: none

Contributions: Y.L., J.-S.Y., L.X. and G.-Q.C. designed research; Y.L., J.-S.Y., L.X., Q.K.  
M.-Q.G., Q.-X.N., Y.-T.S. performed the experiments and analyzed data; Q.-Q.Y. and  
J.-T.X. contributed new reagents/analytic tools; Y.L. and G.-Q.C. wrote the paper.
